# Supplementary material for: The Influence of the Addition of Hemp Press Cake Flour on the Properties of Bovine and Ovine Yoghurts
Source: MDPI journal article supplement (doi:10.3390/foods12050958), 2023-02-24
Supplement: s1 [file s1]

**Table S1:** The results of Three-way ANOVA followed by the post-hoc Tukey test for pH values of a) bovine and b) ovine plain and fortified yoghurts with different proportions of hemp press cake flour (HPCF) during the 7-day storage period.

| Source          | DF | SS    | MS    | F       | <i>p</i> <sup>1</sup> | Storage (day) | pH <sup>2</sup>    | HPCF (%) | pH <sup>2</sup>   |
|-----------------|----|-------|-------|---------|-----------------------|---------------|--------------------|----------|-------------------|
| Type (1)        | 1  | 0.496 | 0.496 | 388.204 | < 0,0001              | 1             | 4.63 <sup>a</sup>  | 0        | 4.45 <sup>f</sup> |
| HPCF (2)        | 5  | 0.716 | 0.143 | 112.117 | < 0,0001              | 3             | 4.58 <sup>b</sup>  | 2        | 4.49 <sup>e</sup> |
| Storage (3)     | 3  | 0.138 | 0.046 | 36.043  | < 0,0001              | 5             | 4.55 <sup>bc</sup> | 4        | 4.54 <sup>d</sup> |
| (1) × (2)       | 5  | 0.035 | 0.007 | 5.421   | 0.000                 | 7             | 4.53 <sup>c</sup>  | 6        | 4.61 <sup>c</sup> |
| (1) × (3)       | 3  | 0.019 | 0.006 | 4.867   | 0.005                 | Type          |                    | 8        | 4.65 <sup>b</sup> |
| (2) × (3)       | 15 | 0.003 | 0.000 | 0.164   | 1.000                 | Bovine        | 4.50 <sup>b</sup>  | 10       | 4.69 <sup>a</sup> |
| (1) × (2) × (3) | 15 | 0.016 | 0.001 | 0.842   | 0.629                 | Ovine         | 4.64 <sup>a</sup>  |          |                   |

<sup>1</sup>Bolded *p*-values are statistically significant (*p* < 0.05)

<sup>2</sup>Different letters indicate statistically significant differences (*p* < 0.05) separately for storage time, type of the yogurt and level of the HPCF addition

**Table S2:** The results of Three-way ANOVA followed by the post-hoc Tukey test for Titratable Acidity (°SH) of a) bovine and b) ovine plain and fortified yoghurts with different proportions of hemp press cake flour (HPCF) during the 7-day storage period.

| Source          | DF | SS     | MS     | F      | <i>p</i> <sup>1</sup> | Storage (day) | TA (°SH) <sup>2</sup> | HPCF (%) | TA (°SH) <sup>2</sup> |
|-----------------|----|--------|--------|--------|-----------------------|---------------|-----------------------|----------|-----------------------|
| Type (1)        | 1  | 1241.1 | 1241.1 | 5229.3 | < 0,0001              | 1             | 35.6 <sup>d</sup>     | 0        | 44.5 <sup>a</sup>     |
| HPCF (2)        | 5  | 915.7  | 183.1  | 771.6  | < 0,0001              | 3             | 39.1 <sup>c</sup>     | 2        | 41.7 <sup>b</sup>     |
| Storage (3)     | 3  | 596.0  | 198.7  | 837.1  | < 0,0001              | 5             | 40.8 <sup>b</sup>     | 4        | 40.1 <sup>c</sup>     |
| (1) × (2)       | 5  | 82.1   | 16.4   | 69.2   | < 0,0001              | 7             | 42.3 <sup>a</sup>     | 6        | 38.6 <sup>d</sup>     |
| (1) × (3)       | 3  | 64.0   | 21.3   | 89.9   | < 0,0001              | Type          |                       | 8        | 36.7 <sup>e</sup>     |
| (2) × (3)       | 15 | 17.0   | 1.1    | 4.8    | < 0,0001              | Bovine        | 43.1 <sup>a</sup>     | 10       | 35.2 <sup>f</sup>     |
| (1) × (2) × (3) | 15 | 18.7   | 1.2    | 5.2    | < 0,0001              | Ovine         | 35.9 <sup>b</sup>     |          |                       |

<sup>1</sup>Bolded *p*-values are statistically significant (*p* < 0.05)

<sup>2</sup>Different letters indicate statistically significant differences (*p* < 0.05) separately for storage time, type of the yogurt and level of the HPCF addition

**Table S3:** The results of Three-way ANOVA followed by the post-hoc Tukey test for *L*\* value of a) bovine and b) ovine plain and fortified yoghurts with different proportions of hemp press cake flour (HPCF) during the 7-day storage period.

| Source          | DF | SS      | MS     | F      | <i>p</i> <sup>1</sup> | Storage (day) | <i>L</i> * <sup>2</sup> | HPCF (%) | <i>L</i> * <sup>2</sup> |
|-----------------|----|---------|--------|--------|-----------------------|---------------|-------------------------|----------|-------------------------|
| Type (1)        | 1  | 634.9   | 634.9  | 377.8  | < 0,0001              | 1             | 63.0 <sup>a</sup>       | 0        | 82.1 <sup>a</sup>       |
| HPCF (2)        | 5  | 16896.0 | 3379.2 | 2011.2 | < 0,0001              | 3             | 61.4 <sup>b</sup>       | 2        | 67.7 <sup>b</sup>       |
| Storage (3)     | 3  | 108.8   | 36.3   | 21.6   | < 0,0001              | 5             | 61.1 <sup>b</sup>       | 4        | 60.9 <sup>c</sup>       |
| (1) × (2)       | 5  | 76.6    | 15.3   | 9.1    | < 0,0001              | 7             | 60.8 <sup>b</sup>       | 6        | 56.1 <sup>d</sup>       |
| (1) × (3)       | 3  | 20.3    | 6.8    | 4.0    | 0.009                 | Type          |                         | 8        | 53.1 <sup>e</sup>       |
| (2) × (3)       | 15 | 41.6    | 2.8    | 1.6    | 0.075                 | Bovine        | 59.5 <sup>b</sup>       | 10       | 49.6 <sup>f</sup>       |
| (1) × (2) × (3) | 15 | 22.5    | 1.5    | 0.9    | 0.574                 | Ovine         | 63.7 <sup>a</sup>       |          |                         |

<sup>1</sup>Bolded *p*-values are statistically significant (*p* < 0.05)

<sup>2</sup>Different letters indicate statistically significant differences (*p* < 0.05) separately for storage time, type of the yogurt and level of the HPCF addition

**Table S4:** The results of Three-way ANOVA followed by the post-hoc Tukey test for  $a^*$  value of a) bovine and b) ovine plain and fortified yoghurts with different proportions of hemp press cake flour (HPCF) during the 7-day storage period.

| Source          | DF | SS    | MS   | F       | $p^1$              | Storage (day) | $a^{*2}$           | HPCF (%) | $a^{*2}$           |
|-----------------|----|-------|------|---------|--------------------|---------------|--------------------|----------|--------------------|
| Type (1)        | 1  | 3.0   | 3.0  | 385.9   | <b>&lt; 0,0001</b> | 1             | -0.11 <sup>c</sup> | 0        | -3.99 <sup>f</sup> |
| HPCF (2)        | 5  | 496.3 | 99.3 | 12811.0 | <b>&lt; 0,0001</b> | 3             | 0.03 <sup>b</sup>  | 2        | 0.00 <sup>e</sup>  |
| Storage (3)     | 3  | 1.0   | 0.3  | 44.0    | <b>&lt; 0,0001</b> | 5             | 0.08 <sup>ab</sup> | 4        | 0.51 <sup>d</sup>  |
| (1) × (2)       | 5  | 7.7   | 1.5  | 199.2   | <b>&lt; 0,0001</b> | 7             | 0.12 <sup>a</sup>  | 6        | 1.06 <sup>c</sup>  |
| (1) × (3)       | 3  | 0.1   | 0.0  | 3.7     | <b>0.015</b>       | <b>Type</b>   |                    | 8        | 1.19 <sup>b</sup>  |
| (2) × (3)       | 15 | 1.3   | 0.1  | 10.9    | <b>&lt; 0,0001</b> | Bovine        | 0.17 <sup>a</sup>  | 10       | 1.41 <sup>a</sup>  |
| (1) × (2) × (3) | 15 | 0.9   | 0.1  | 8.1     | <b>&lt; 0,0001</b> | Ovine         | -0.11 <sup>b</sup> |          |                    |

<sup>1</sup>Bolded  $p$ -values are statistically significant ( $p < 0.05$ )

<sup>2</sup>Different letters indicate statistically significant differences ( $p < 0.05$ ) separately for storage time, type of the yogurt and level of the HPCF addition

**Table S5:** The results of Three-way ANOVA followed by the post-hoc Tukey test for  $b^*$  value of a) bovine and b) ovine plain and fortified yoghurts with different proportions of hemp press cake flour (HPCF) during the 7-day storage period.

| Source          | DF | SS     | MS    | F     | $p^1$              | Storage (day) | $b^{*2}$ | HPCF (%) | $b^{*2}$ |
|-----------------|----|--------|-------|-------|--------------------|---------------|----------|----------|----------|
| Type (1)        | 1  | 76.5   | 76.5  | 97.8  | <b>&lt; 0,0001</b> | 1             | 8.6b     | 0        | 3.1f     |
| HPCF (2)        | 5  | 2818.4 | 563.7 | 720.5 | <b>&lt; 0,0001</b> | 3             | 9.6a     | 2        | 5.3e     |
| Storage (3)     | 3  | 31.8   | 10.6  | 13.6  | <b>&lt; 0,0001</b> | 5             | 9.7a     | 4        | 8.1d     |
| (1) × (2)       | 5  | 137.6  | 27.5  | 35.2  | <b>&lt; 0,0001</b> | 7             | 9.8a     | 6        | 10.9c    |
| (1) × (3)       | 3  | 0.8    | 0.3   | 0.3   | 0.811              | <b>Type</b>   |          | 8        | 13.3b    |
| (2) × (3)       | 15 | 13.0   | 0.9   | 1.1   | 0.361              | Bovine        | 8.7b     | 10       | 15.9a    |
| (1) × (2) × (3) | 15 | 10.0   | 0.7   | 0.9   | 0.621              | Ovine         | 10.2a    |          |          |

<sup>1</sup>Bolded  $p$ -values are statistically significant ( $p < 0.05$ )

<sup>2</sup>Different letters indicate statistically significant differences ( $p < 0.05$ ) separately for storage time, type of the yogurt and level of the HPCF addition

**Table S6:** The results of Three-way ANOVA followed by the post-hoc Tukey test for Total phenolic content (TCP) in a) bovine and b) ovine plain and fortified yoghurts with different proportions of hemp press cake flour (HPCF) during the 7-day storage period.

| Source          | DF | SS    | MS    | F      | $p^1$              | Storage (day) | TPC (mg GAE/g) <sup>2</sup> | HPCF (%) | TPC (mg GAE/g) <sup>2</sup> |
|-----------------|----|-------|-------|--------|--------------------|---------------|-----------------------------|----------|-----------------------------|
| Type (1)        | 1  | 41.4  | 41.4  | 512.8  | <b>&lt; 0,0001</b> | 1             | 4.6 <sup>d</sup>            | 0        | 2.2 <sup>f</sup>            |
| HPCF (2)        | 5  | 528.4 | 105.7 | 1307.5 | <b>&lt; 0,0001</b> | 3             | 5.5 <sup>c</sup>            | 2        | 3.5 <sup>e</sup>            |
| Storage (3)     | 3  | 49.6  | 16.5  | 204.4  | <b>&lt; 0,0001</b> | 5             | 6.1 <sup>b</sup>            | 4        | 5.0 <sup>d</sup>            |
| (1) × (2)       | 5  | 30.4  | 6.1   | 75.2   | <b>&lt; 0,0001</b> | 7             | 6.5 <sup>a</sup>            | 6        | 6.6 <sup>c</sup>            |
| (1) × (3)       | 3  | 6.7   | 2.2   | 27.5   | <b>&lt; 0,0001</b> | <b>Type</b>   |                             | 8        | 7.9 <sup>b</sup>            |
| (2) × (3)       | 15 | 6.9   | 0.5   | 5.7    | <b>&lt; 0,0001</b> | Bovine        | 5.0 <sup>b</sup>            | 10       | 8.9 <sup>a</sup>            |
| (1) × (2) × (3) | 15 | 6.0   | 0.4   | 5.0    | <b>&lt; 0,0001</b> | Ovine         | 6.3 <sup>a</sup>            |          |                             |

<sup>1</sup>Bolded  $p$ -values are statistically significant ( $p < 0.05$ )

<sup>2</sup>Different letters indicate statistically significant differences ( $p < 0.05$ ) separately for storage time, type of the yogurt and level of the HPCF addition

**Table S7:** The results of Three-way ANOVA followed by the post-hoc Tukey test for Antioxidant activity (AOA) of a) bovine and b) ovine plain and fortified yoghurts with different proportions of hemp press cake flour (HPCF) during the 7-day storage period.

| Source          | DF | SS     | MS     | F     | <i>p</i> <sup>1</sup> | Storage (day) | AOA (% inhibition of DPPH) <sup>2</sup> | HPCF (%) | AOA (% inhibition of DPPH) <sup>2</sup> |
|-----------------|----|--------|--------|-------|-----------------------|---------------|-----------------------------------------|----------|-----------------------------------------|
| Type (1)        | 1  | 75.8   | 75.8   | 42.9  | <b>&lt; 0,0001</b>    | 1             | 18.8d                                   | 0        | 11.2f                                   |
| HPCF (2)        | 5  | 8212.4 | 1642.5 | 929.8 | <b>&lt; 0,0001</b>    | 3             | 22.5c                                   | 2        | 14.9e                                   |
| Storage (3)     | 3  | 1781.2 | 593.7  | 336.1 | <b>&lt; 0,0001</b>    | 5             | 25.6b                                   | 4        | 21.8d                                   |
| (1) × (2)       | 5  | 26.3   | 5.3    | 3.0   | <b>0.020</b>          | 7             | 30.5a                                   | 6        | 28.8c                                   |
| (1) × (3)       | 3  | 214.0  | 71.3   | 40.4  | <b>&lt; 0,0001</b>    | <b>Type</b>   |                                         | 8        | 32.9b                                   |
| (2) × (3)       | 15 | 132.5  | 8.8    | 5.0   | <b>&lt; 0,0001</b>    | Bovine        | 23.5b                                   | 10       | 36.6a                                   |
| (1) × (2) × (3) | 15 | 55.0   | 3.7    | 2.1   | <b>0.029</b>          | Ovine         | 25.3a                                   |          |                                         |

<sup>1</sup>Bolded *p*-values are statistically significant (*p* < 0.05)

<sup>2</sup>Different letters indicate statistically significant differences (*p* < 0.05) separately for storage time, type of the yogurt and level of the HPCF addition

**Table S8:** The results of Three-way ANOVA followed by the post-hoc Tukey test for bacterial count of *Lactobacillus* spp. strains in a) bovine and b) ovine plain and fortified yoghurts with different proportions of hemp press cake flour (HPCF) during the 7-day storage period.

| Source          | DF | SS    | MS    | F      | <i>p</i> <sup>1</sup> | Storage (day) | <i>Lactobacillus</i> spp. (log CFU/mL) <sup>2</sup> | HPCF (%) | <i>Lactobacillus</i> spp. (log CFU/mL) <sup>2</sup> |
|-----------------|----|-------|-------|--------|-----------------------|---------------|-----------------------------------------------------|----------|-----------------------------------------------------|
| Type (1)        | 1  | 0.154 | 0.154 | 36.401 | <b>&lt; 0,0001</b>    | 1             | 6.72 <sup>a</sup>                                   | 0        | 6.76 <sup>a</sup>                                   |
| HPCF (2)        | 5  | 0.562 | 0.112 | 26.530 | <b>&lt; 0,0001</b>    | 3             | 6.70 <sup>a</sup>                                   | 2        | 6.73 <sup>ab</sup>                                  |
| Storage (3)     | 3  | 0.187 | 0.062 | 14.749 | <b>&lt; 0,0001</b>    | 5             | 6.66 <sup>b</sup>                                   | 4        | 6.70 <sup>bc</sup>                                  |
| (1) × (2)       | 5  | 0.036 | 0.007 | 1.715  | 0.138                 | 7             | 6.63 <sup>b</sup>                                   | 6        | 6.66 <sup>cd</sup>                                  |
| (1) × (3)       | 3  | 0.001 | 0.000 | 0.085  | 0.968                 | <b>Type</b>   |                                                     | 8        | 6.62 <sup>de</sup>                                  |
| (2) × (3)       | 15 | 0.004 | 0.000 | 0.070  | 1.000                 | Bovine        | 6.71 <sup>a</sup>                                   | 10       | 6.58 <sup>e</sup>                                   |
| (1) × (2) × (3) | 15 | 0.002 | 0.000 | 0.034  | 1.000                 | Ovine         | 6.64 <sup>b</sup>                                   |          |                                                     |

<sup>1</sup>Bolded *p*-values are statistically significant (*p* < 0.05)

<sup>2</sup>Different letters indicate statistically significant differences (*p* < 0.05) separately for storage time, type of the yogurt and level of the HPCF addition

**Table S9:** The results of Three-way ANOVA followed by the post-hoc Tukey test for bacterial count of *Streptococcus* spp. strains in a) bovine and b) ovine plain and fortified yoghurts with different proportions of hemp press cake flour (HPCF) during the 7-day storage period.

| Source          | DF | SS    | MS    | F      | <i>p</i> <sup>1</sup> | Storage (day) | <i>Streptococcus</i> spp. (log CFU/mL) <sup>2</sup> | HPCF (%) | <i>Streptococcus</i> spp. (log CFU/mL) <sup>2</sup> |
|-----------------|----|-------|-------|--------|-----------------------|---------------|-----------------------------------------------------|----------|-----------------------------------------------------|
| Type (1)        | 1  | 0.003 | 0.003 | 1.108  | 0.295                 | 1             | 7.99 <sup>a</sup>                                   | 0        | 8.04 <sup>a</sup>                                   |
| HPCF (2)        | 5  | 0.809 | 0.162 | 64.364 | <b>&lt; 0,0001</b>    | 3             | 7.96 <sup>b</sup>                                   | 2        | 8.00 <sup>ab</sup>                                  |
| Storage (3)     | 3  | 0.274 | 0.091 | 36.394 | <b>&lt; 0,0001</b>    | 5             | 7.92 <sup>c</sup>                                   | 4        | 7.97 <sup>b</sup>                                   |
| (1) × (2)       | 5  | 0.018 | 0.004 | 1.405  | 0.229                 | 7             | 7.88 <sup>d</sup>                                   | 6        | 7.92 <sup>c</sup>                                   |
| (1) × (3)       | 3  | 0.006 | 0.002 | 0.766  | 0.516                 | <b>Type</b>   |                                                     | 8        | 7.89 <sup>c</sup>                                   |
| (2) × (3)       | 15 | 0.045 | 0.003 | 1.189  | 0.294                 | Bovine        | 7.93 <sup>a</sup>                                   | 10       | 7.81 <sup>d</sup>                                   |
| (1) × (2) × (3) | 15 | 0.007 | 0.000 | 0.181  | 1.000                 | Ovine         | 7.94 <sup>a</sup>                                   |          |                                                     |

<sup>1</sup>Bolded *p*-values are statistically significant (*p* < 0.05)

<sup>2</sup>Different letters indicate statistically significant differences (*p* < 0.05) separately for storage time, type of the yogurt and level of the HPCF addition

**Table S10:** The results of Three-way ANOVA followed by the post-hoc Tukey test for bacterial count of *Bifidobacterium* spp. strains in a) bovine and b) ovine plain and fortified yoghurts with different proportions of hemp press cake flour (HPCF) during the 7-day storage period.

| Source          | DF | SS    | MS    | F       | <i>p</i> <sup>1</sup> | Storage (day) | <i>Bifidobacterium</i> spp. (log CFU/mL) <sup>2</sup> | HPCF (%) | <i>Bifidobacterium</i> spp. (log CFU/mL) <sup>2</sup> |
|-----------------|----|-------|-------|---------|-----------------------|---------------|-------------------------------------------------------|----------|-------------------------------------------------------|
| Type (1)        | 1  | 0.027 | 0.027 | 8.281   | <b>0.005</b>          | 1             | 7.23 <sup>a</sup>                                     | 0        | 7.28 <sup>a</sup>                                     |
| HPCF (2)        | 5  | 1.695 | 0.339 | 105.120 | <b>&lt; 0.0001</b>    | 3             | 7.18 <sup>b</sup>                                     | 2        | 7.23 <sup>ab</sup>                                    |
| Storage (3)     | 3  | 0.869 | 0.290 | 89.862  | <b>&lt; 0.0001</b>    | 5             | 7.11 <sup>c</sup>                                     | 4        | 7.19 <sup>b</sup>                                     |
| (1) × (2)       | 5  | 0.018 | 0.004 | 1.118   | 0.356                 | 7             | 7.02 <sup>d</sup>                                     | 6        | 7.12 <sup>c</sup>                                     |
| (1) × (3)       | 3  | 0.039 | 0.013 | 4.071   | <b>0.009</b>          | <b>Type</b>   |                                                       | 8        | 7.02 <sup>d</sup>                                     |
| (2) × (3)       | 15 | 0.133 | 0.009 | 2.753   | <b>0.001</b>          | Bovine        | 7.15 <sup>a</sup>                                     | 10       | 6.97 <sup>e</sup>                                     |
| (1) × (2) × (3) | 15 | 0.039 | 0.003 | 0.803   | 0.672                 | Ovine         | 7.12 <sup>b</sup>                                     |          |                                                       |

<sup>1</sup>Bolded *p*-values are statistically significant (*p* < 0.05)

<sup>2</sup>Different letters indicate statistically significant differences (*p* < 0.05) separately for storage time, type of the yogurt and level of the HPCF addition

**Table S11:** The results of Three-way ANOVA followed by the post-hoc Tukey test for count of yeasts and moulds in a) bovine and b) ovine plain and fortified yoghurts with different proportions of hemp press cake flour (HPCF) during the 7-day storage period.

| Source          | DF | SS   | MS   | F        | <i>p</i> <sup>1</sup> | Storage (day) | Yeasts and moulds (log CFU/mL) <sup>2</sup> | HPCF (%) | Yeasts and moulds (log CFU/mL) <sup>2</sup> |
|-----------------|----|------|------|----------|-----------------------|---------------|---------------------------------------------|----------|---------------------------------------------|
| Type (1)        | 1  | 0.00 | 0.00 | 3.35     | 0.070                 | 1             | 0.00 <sup>b</sup>                           | 0        | 0.016 <sup>e</sup>                          |
| HPCF (2)        | 5  | 0.05 | 0.01 | 318.36   | <b>&lt; 0.0001</b>    | 3             | 0.00 <sup>b</sup>                           | 2        | 0.052 <sup>d</sup>                          |
| Storage (3)     | 3  | 1.29 | 0.43 | 14367.35 | <b>&lt; 0.0001</b>    | 5             | 0.00 <sup>b</sup>                           | 4        | 0.058 <sup>c</sup>                          |
| (1) × (2)       | 5  | 0.00 | 0.00 | 0.84     | 0.527                 | 7             | 0.218 <sup>a</sup>                          | 6        | 0.064 <sup>b</sup>                          |
| (1) × (3)       | 3  | 0.00 | 0.00 | 3.35     | <b>0.022</b>          | <b>Type</b>   |                                             | 8        | 0.067 <sup>ab</sup>                         |
| (2) × (3)       | 15 | 0.14 | 0.01 | 318.36   | <b>&lt; 0.0001</b>    | Bovine        | 0.054 <sup>a</sup>                          | 10       | 0.070 <sup>a</sup>                          |
| (1) × (2) × (3) | 15 | 0.00 | 0.00 | 0.84     | 0.635                 | Ovine         | 0.055 <sup>a</sup>                          |          |                                             |

<sup>1</sup>Bolded *p*-values are statistically significant (*p* < 0.05)

<sup>2</sup>Different letters indicate statistically significant differences (*p* < 0.05) separately for storage time, type of the yogurt and level of the HPCF addition

**Table S12:** The results of Three-way ANOVA followed by the post-hoc Tukey test of sensory scores in a) bovine and b) ovine plain and fortified yoghurts with different proportions of hemp press cake flour (HPCF).

| Source            | DF | SS    | MS   | F     | <i>p</i> <sup>1</sup> | Type   | Score <sup>2</sup> | HPCF (%) | Score <sup>2</sup> |
|-------------------|----|-------|------|-------|-----------------------|--------|--------------------|----------|--------------------|
| <b>Appearance</b> |    |       |      |       |                       | Bovine | 7.2 <sup>a</sup>   | 0        | 8.6 <sup>a</sup>   |
| Type (1)          | 1  | 0.3   | 0.3  | 0.4   | 0.522                 | Ovine  | 7.1 <sup>a</sup>   | 2        | 8.3 <sup>a</sup>   |
| HPCF (2)          | 5  | 88.8  | 17.8 | 24.7  | <b>&lt; 0,0001</b>    |        |                    | 4        | 7.3 <sup>b</sup>   |
| (1) × (2)         | 5  | 10.2  | 2.0  | 2.8   | <b>0.021</b>          |        |                    | 6        | 6.6 <sup>bc</sup>  |
|                   |    |       |      |       |                       |        |                    | 8        | 6.2 <sup>c</sup>   |
|                   |    |       |      |       |                       |        |                    | 10       | 5.9 <sup>c</sup>   |
| <b>Texture</b>    |    |       |      |       |                       | Bovine | 6.8 <sup>a</sup>   | 0        | 8.3 <sup>a</sup>   |
| Type (1)          | 1  | 8.7   | 8.7  | 12.4  | <b>0.001</b>          | Ovine  | 6.2 <sup>b</sup>   | 2        | 7.7 <sup>ab</sup>  |
| HPCF (2)          | 5  | 173.6 | 34.7 | 49.4  | <b>&lt; 0,0001</b>    |        |                    | 4        | 7.4 <sup>b</sup>   |
| (1) × (2)         | 5  | 2.1   | 0.4  | 0.6   | 0.700                 |        |                    | 6        | 6.1 <sup>c</sup>   |
|                   |    |       |      |       |                       |        |                    | 8        | 5.2 <sup>d</sup>   |
|                   |    |       |      |       |                       |        |                    | 10       | 4.2 <sup>e</sup>   |
| <b>Aroma</b>      |    |       |      |       |                       | Bovine | 7.2 <sup>a</sup>   | 0        | 8.6 <sup>a</sup>   |
| Type (1)          | 1  | 0.2   | 0.2  | 0.2   | 0.653                 | Ovine  | 7.1 <sup>a</sup>   | 2        | 8.2 <sup>a</sup>   |
| HPCF (2)          | 5  | 110.5 | 22.1 | 23.7  | <b>&lt; 0,0001</b>    |        |                    | 4        | 7.8 <sup>a</sup>   |
| (1) × (2)         | 5  | 11.0  | 2.2  | 2.3   | <b>0.049</b>          |        |                    | 6        | 6.4 <sup>b</sup>   |
|                   |    |       |      |       |                       |        |                    | 8        | 6.1 <sup>b</sup>   |
|                   |    |       |      |       |                       |        |                    | 10       | 5.6 <sup>b</sup>   |
| <b>Taste</b>      |    |       |      |       |                       | Bovine | 6.9 <sup>a</sup>   | 0        | 8.6 <sup>a</sup>   |
| Type (1)          | 1  | 6.3   | 6.3  | 7.4   | <b>0.008</b>          | Ovine  | 6.4 <sup>b</sup>   | 2        | 8.3 <sup>a</sup>   |
| HPCF (2)          | 5  | 288.1 | 57.6 | 67.5  | <b>&lt; 0,0001</b>    |        |                    | 4        | 7.6 <sup>ab</sup>  |
| (1) × (2)         | 5  | 9.2   | 1.8  | 2.2   | 0.068                 |        |                    | 6        | 6.9 <sup>b</sup>   |
|                   |    |       |      |       |                       |        |                    | 8        | 5.3 <sup>c</sup>   |
|                   |    |       |      |       |                       |        |                    | 10       | 3.3 <sup>d</sup>   |
| <b>Aftertaste</b> |    |       |      |       |                       | Bovine | 7.1 <sup>a</sup>   | 0        | 8.4 <sup>a</sup>   |
| Type (1)          | 1  | 47.3  | 47.3 | 65.1  | <b>&lt; 0,0001</b>    | Ovine  | 5.6 <sup>b</sup>   | 2        | 7.9 <sup>ab</sup>  |
| HPCF (2)          | 5  | 281.9 | 56.4 | 77.6  | <b>&lt; 0,0001</b>    |        |                    | 4        | 7.4 <sup>bc</sup>  |
| (1) × (2)         | 5  | 7.5   | 1.5  | 2.1   | 0.078                 |        |                    | 6        | 6.4 <sup>c</sup>   |
|                   |    |       |      |       |                       |        |                    | 8        | 4.6 <sup>d</sup>   |
|                   |    |       |      |       |                       |        |                    | 10       | 3.3 <sup>e</sup>   |
| <b>Overall</b>    |    |       |      |       |                       | Bovine | 7.0 <sup>a</sup>   | 0        | 8.5 <sup>a</sup>   |
| Type (1)          | 1  | 7.1   | 7.1  | 40.1  | <b>&lt; 0,0001</b>    | Ovine  | 6.5 <sup>b</sup>   | 2        | 8.1 <sup>a</sup>   |
| HPCF (2)          | 5  | 173.5 | 34.7 | 196.2 | <b>&lt; 0,0001</b>    |        |                    | 4        | 7.5 <sup>ab</sup>  |
| (1) × (2)         | 5  | 3.9   | 0.8  | 4.4   | <b>0.001</b>          |        |                    | 6        | 6.5 <sup>b</sup>   |
|                   |    |       |      |       |                       |        |                    | 8        | 5.5 <sup>c</sup>   |
|                   |    |       |      |       |                       |        |                    | 10       | 4.4 <sup>d</sup>   |

<sup>1</sup>Bolded *p*-values are statistically significant (*p* < 0.05)

<sup>2</sup>Different letters indicate statistically significant differences (*p* < 0.05) separately for each sensory attribute
